# Supplementary material for: Durvalumab-Associated Pneumonitis in Patients with Locally Advanced Non-Small Cell Lung Cancer: A Real-World Population Study
Source: MDPI journal article supplement (doi:10.3390/curroncol30120757), 2023-12-09
Supplement: s1 [file s1]

**Table S1.** Literature review with large retrospective studies on durvalumab associated pneumonitis; n>50)

| Study                      | Patients who received durvalumab (n) | Pneumonitis (any grade, %) | Severe pneumonitis definition | Severe pneumonitis (%) | Discontinuation from pneumonitis (%)        | Corticosteroid use (%) |
|----------------------------|--------------------------------------|----------------------------|-------------------------------|------------------------|---------------------------------------------|------------------------|
| Current study              | 189                                  | 26                         | ≥ Grade 3                     | 9                      | In rechallenge, 1 out of 13 patients (8%)   | 86                     |
| Jung et al. 2020 [1]       | 61                                   | 81.0                       | ≥ Grade 3                     | 14.3                   | In rechallenge, 2 out of 7 patients (28.6%) | N/A                    |
| Shaverdian et al. 2020 [2] | 62                                   | 21                         | ≥ Grade 2                     | 18                     | 48                                          | 73                     |
| Bruni et al. 2021 [3]      | 155                                  | 17.4                       | ≥ Grade 3                     | 1.9                    | 7.1                                         | N/A                    |
| Saito et al. 2021 [4]      | 225                                  | 83                         | ≥ Grade 3                     | 7                      | In rechallenge, 3 out of 21 patients (14%)  | 25                     |
| Desilets et al. 2021 [5]   | 147                                  | 29.9                       | ≥ Grade 3                     | 6.1                    | N/A                                         | 17                     |
| LeClair et al. 2021 [6]    | 83                                   | 25.3                       | ≥ Grade 3                     | 6                      | 67                                          | 90                     |
| Nishimura et al. 2021 [7]  | 82                                   | 76                         | ≥ Grade 3                     | 5                      | N/A                                         | n/a                    |
| Oshiro et al. 2021 [8]     | 91                                   | 88                         | ≥ Grade 3                     | 12                     | N/A                                         | 68                     |

|                                   |    |      |           |               |      |     |
|-----------------------------------|----|------|-----------|---------------|------|-----|
| Tsukita et al. 2021 [9]           | 87 | 89   | ≥ Grade 3 | 7.4           | 18.4 | N/A |
| Cruz-Chamorro et al.<br>2022 [10] | 61 | 37.7 | N/A       | 8.2 (grade 3) | N/A  | N/A |
| Ellison et al. 2023<br>[11]       | 78 | 28.2 | Grade 5   | 9             | 67   | N/A |

## References

1. Jung, H.A.; Noh, J.M.; Sun, J.-M.; Lee, S.-H.; Ahn, J.S.; Ahn, M.-J.; Pyo, H.; Ahn, Y.C.; Park, K. Real World Data of Durvalumab Consolidation after Chemoradiotherapy in Stage III Non-Small-Cell Lung Cancer. *Lung Cancer* **2020**, *146*, 23–29, doi:10.1016/j.lungcan.2020.05.035.
2. Shaverdian, N.; Thor, M.; Shepherd, A.F.; Offin, M.D.; Jackson, A.; Wu, A.J.; Gelblum, D.Y.; Yorke, E.D.; Simone, C.B.; Chaft, J.E.; et al. Radiation Pneumonitis in Lung Cancer Patients Treated with Chemoradiation plus Durvalumab. *Cancer Med.* **2020**, *9*, 4622–4631, doi:10.1002/cam4.3113.
3. Bruni, A.; Scotti, V.; Borghetti, P.; Vagge, S.; Cozzi, S.; D'Angelo, E.; Giaj Levra, N.; Fozza, A.; Taraborrelli, M.; Piperno, G.; et al. A Real-World, Multicenter, Observational Retrospective Study of Durvalumab After Concomitant or Sequential Chemoradiation for Unresectable Stage III Non-Small Cell Lung Cancer. *Front. Oncol.* **2021**, *11*, 744956, doi:10.3389/fonc.2021.744956.
4. Saito, G.; Oya, Y.; Taniguchi, Y.; Kawachi, H.; Daichi, F.; Matsumoto, H.; Iwasawa, S.; Suzuki, H.; Niitsu, T.; Miyauchi, E.; et al. Real-World Survey of Pneumonitis and Its Impact on Durvalumab Consolidation Therapy in Patients with Non-Small Cell Lung Cancer Who Received Chemoradiotherapy after Durvalumab Approval (HOPE-005/CRIMSON). *Lung Cancer* **2021**, *161*, 86–93, doi:10.1016/j.lungcan.2021.08.019.
5. Desilets, A.; Blanc-Durand, F.; Lau, S.; Hakozaiki, T.; Kitadai, R.; Malo, J.; Belkaid, W.; Richard, C.; Messaoudene, M.; Cvetkovic, L.; et al. Durvalumab Therapy Following Chemoradiation Compared with a Historical Cohort Treated with Chemoradiation Alone in Patients with Stage III Non-Small Cell Lung Cancer: A Real-World Multicentre Study. *Eur. J. Cancer* **2021**, *142*, 83–91, doi:10.1016/j.ejca.2020.10.008.
6. LeClair, J.N.; Merl, M.Y.; Cohenuram, M.; Luon, D. Real-World Incidence of Pneumonitis in Patients Receiving Durvalumab. *Clin. Lung Cancer* **2022**, *23*, 34–42, doi:10.1016/j.clc.2021.08.006.
7. Nishimura, A.; Ono, A.; Wakuda, K.; Kawabata, T.; Yabe, M.; Miyawaki, T.; Miyawaki, E.; Kodama, H.; Nishioka, N.; Mamesaya, N.; et al. Prognostic Impact of Pneumonitis after Durvalumab Therapy in Patients with Locally Advanced Non-Small Cell Lung Cancer. *Invest. New Drugs* **2022**, *40*, 403–410, doi:10.1007/s10637-021-01191-6.
8. Oshiro, Y.; Mizumoto, M.; Sekino, Y.; Maruo, K.; Ishida, T.; Sumiya, T.; Nakamura, M.; Ohkawa, A.; Takizawa, D.; Okumura, T.; et al. Risk Factor of Pneumonitis on Dose-Volume Relationship for Chemoradiotherapy with Durvalumab: Multi-Institutional Research in Japan. *Clin. Transl. Radiat. Oncol.* **2021**, *29*, 54–59, doi:10.1016/j.ctro.2021.05.009.
9. Tsukita, Y.; Yamamoto, T.; Mayahara, H.; Hata, A.; Takeda, Y.; Nakayama, H.; Tanaka, S.; Uchida, J.; Usui, K.; Toyoda, T.; et al. Intensity-Modulated Radiation Therapy with Concurrent Chemotherapy Followed by Durvalumab for Stage III Non-Small Cell Lung Cancer: A Multi-Center Retrospective Study. *Radiother. Oncol.* **2021**, *160*, 266–272, doi:10.1016/j.radonc.2021.05.016.
10. Cruz-Chamorro, R.J.; Rishi, A.; Liveringhouse, C.; Bryant, J.M.M.; Perez, B.A.; Rosenberg, S.A.; Dilling, T.J. Real World Rates and Predictive Factors of Pneumonitis in Advanced, Non-Resectable NSCLC Treated with Concurrent Chemoradiation and Durvalumab. *Int. J. Radiat. Oncol.* **2022**, *114*, e370, doi:10.1016/j.ijrobp.2022.07.1502.
11. Ellison, C.; Martens, M.; Alvarez Argote, J.; Benz, S.; Currey, A.; Johnstone, C.; Klawikowski, S.; Livingston, K.; Longo, J.M.; Menon, S.; et al. High-Grade Pneumonitis Events in Unresectable, Locally Advanced Non-Small Cell Lung Cancer Patients Treated with Definitive Chemoradiation Followed by Adjuvant Durvalumab. *JTO Clin. Res. Rep.* **2023**, 100537, doi:10.1016/j.jtocrr.2023.100537.
